# Supplementary material for: Heat-Modified Citrus Pectin Induces Apoptosis-Like Cell Death and Autophagy in HepG2 and A549 Cancer Cells
Source: PubMed Central journal article supplement (PMC4368604; doi:10.1371/journal.pone.0115831), 2015-03-20
Supplement: pone.0115831.s004.pdf [file pone.0115831.s004.pdf]

**A**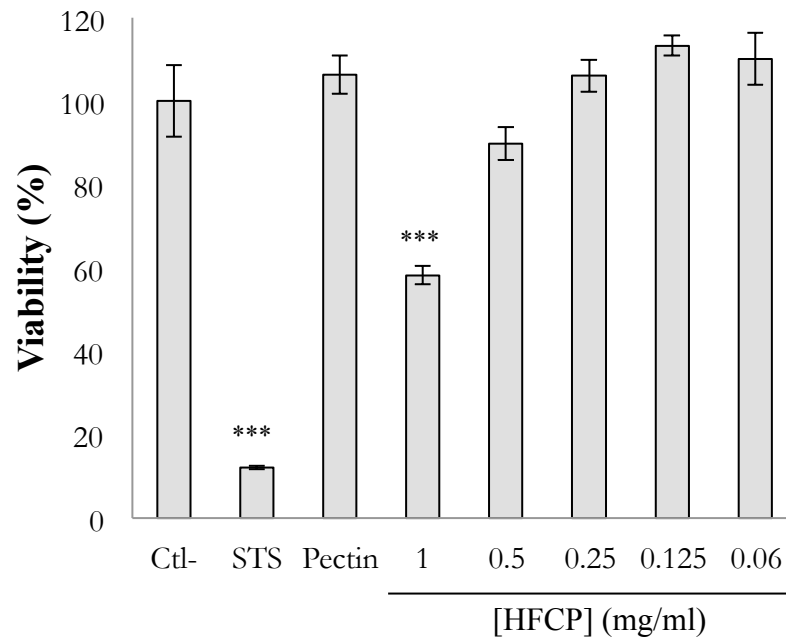**B**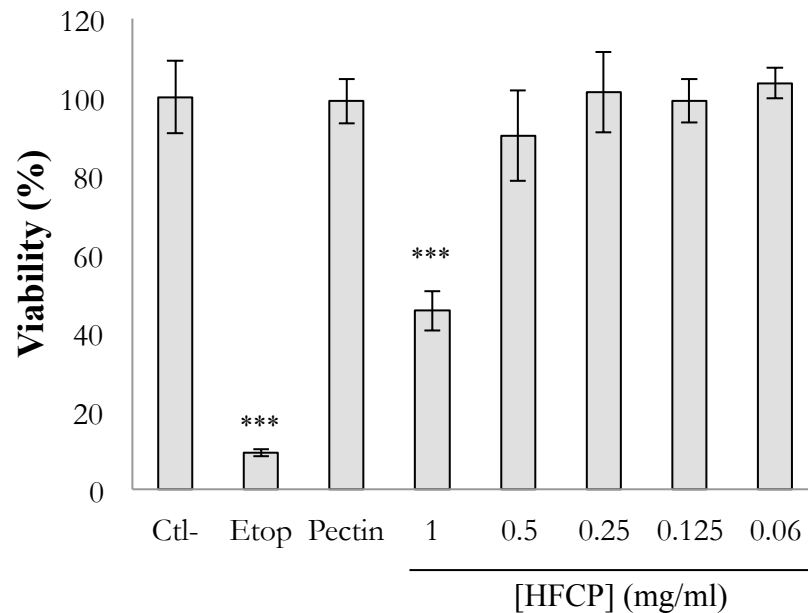

**Fig. S4: Cytotoxic effect of heat modified citrus pectin at low doses.** HepG2 cells were incubated with medium alone (Ctl), 1  $\mu$ M staurosporine (STS), 50  $\mu$ M etoposide (Etop), different concentrations of hydrolysed citrus pectin (HFCP) or 3 mg/ml citrus pectin (Pectin), with **(A)** or without **(B)** 10% foetal calf serum. Cell viability was assessed using a MTT assay after 72h of incubation. Data are means of triplicates  $\pm$  SD (n=3). . \*\*\* : p< 0.001 using ANOVA I and Tukey's multiple comparison test.
