# Supplementary material for: Heat-Modified Citrus Pectin Induces Apoptosis-Like Cell Death and Autophagy in HepG2 and A549 Cancer Cells
Source: PubMed Central journal article supplement (PMC4368604; doi:10.1371/journal.pone.0115831), 2015-03-20
Supplement: pone.0115831.s006.pdf [file pone.0115831.s006.pdf]

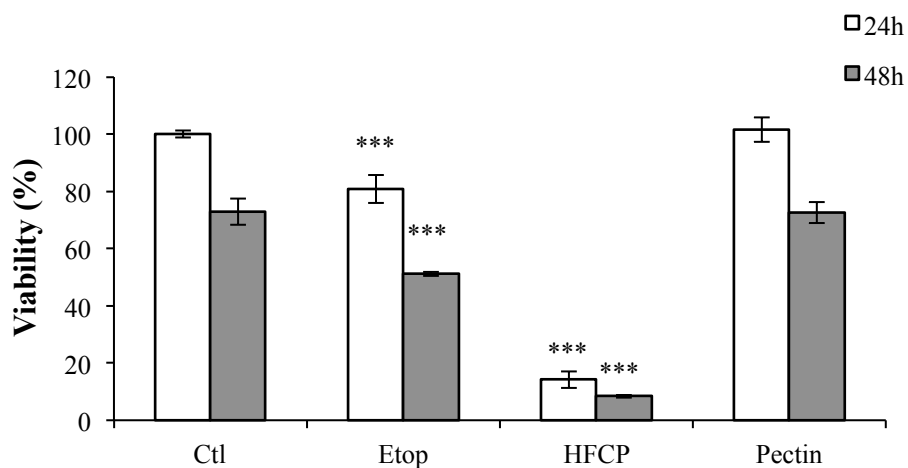

**Fig. S6: Cytotoxicity of heat modified citrus pectin in MCF7 cells.** MCF7 cells were incubated with medium alone (Ctl), 50 μM etoposide (etop), 3 mg/ml hydrolysed citrus pectin (HFCP) or 3 mg/ml citrus pectin (Pectin). Cell viability was assessed using a MTT assay after 24h and 48h of incubation. Data are means of triplicates +/- SD (n=3). . \*\*\* : p< 0.001 using ANOVA I and Tukey's multiple comparison test.
